# Supplementary material for: Extracellular retention of a cyclopamine nanoformulation leveraging larger size and more negative charge for improved breast cancer treatment
Source: Royal Society of Chemistry journal article supplement (doi:10.1039/c7tb02777j), 2018-01-01
Supplement: c7tb02777j1.pdf [file c7tb02777j1.pdf]

## **Extracellular retention of cyclopamine nanoformulation leveraging larger size and more negative charge for improved breast cancer treatment**

Chan Feng,<sup>a</sup> Kun Wang,<sup>b</sup> Yun Lin,<sup>a</sup> Zhiwang Song,<sup>a</sup> Yonglin Lu,<sup>a</sup> Jie Liu,<sup>a</sup> Donglei Zhu,<sup>a</sup> Yongyong Li<sup>\*b</sup> and  
Chunyan Dong<sup>\*a</sup>

### **Supporting Information for Publication**

#### **Additional Figures**

To support the results presented in the main article, additional figures are shown in this supporting document.

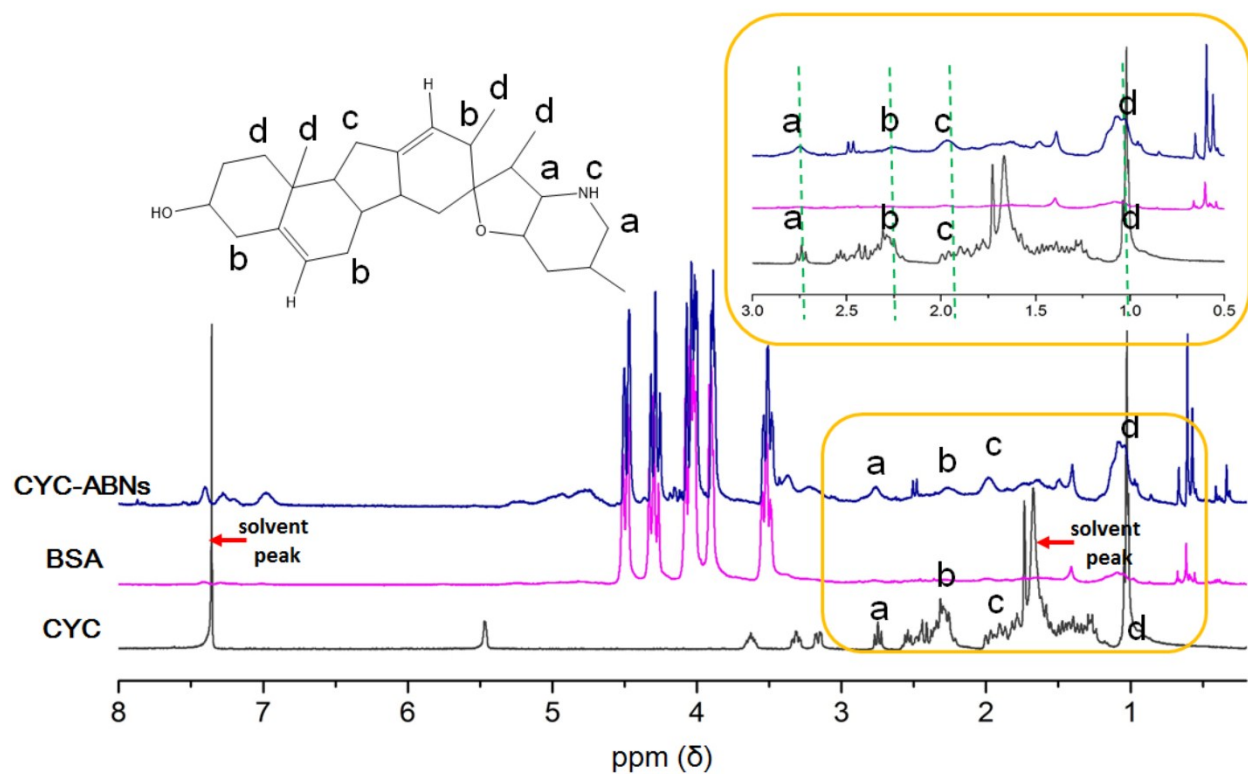

**Figure S1.**  $^1\text{H}$  NMR spectroscopy of BSA, CYC and CYC-ABNs.

<sup>a</sup> Cancer center, Shanghai East Hospital, Tongji University, Shanghai 200120, P. R. China. \*Email: cy\_dong@tongji.edu.cn

<sup>b</sup> The Institute for Biomedical Engineering & Nano Science (iNANO), Tongji University School of Medicine, Shanghai 200092, P. R. China. \*Email: yongyong\_li@tongji.edu.cn

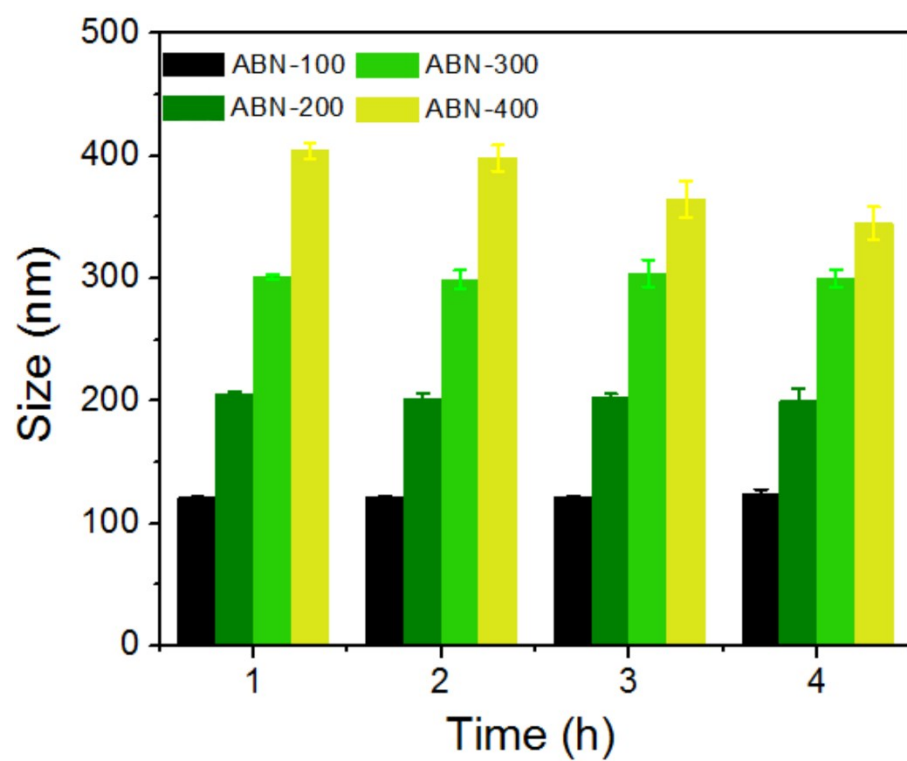

**Figure S2.** Size of CYC-ABNs with different size incubating with PBS with different time.

**Table S1.** Size and charge of CYC-ABNs.

| Formulation       | ABN-100    | ABN-200     | ABN-300     | ABN-400     |
|-------------------|------------|-------------|-------------|-------------|
| Size [nm]         | 100        | 200         | 300         | 400         |
| Surface potential | $-7 \pm 1$ | $-11 \pm 2$ | $-13 \pm 1$ | $-15 \pm 1$ |

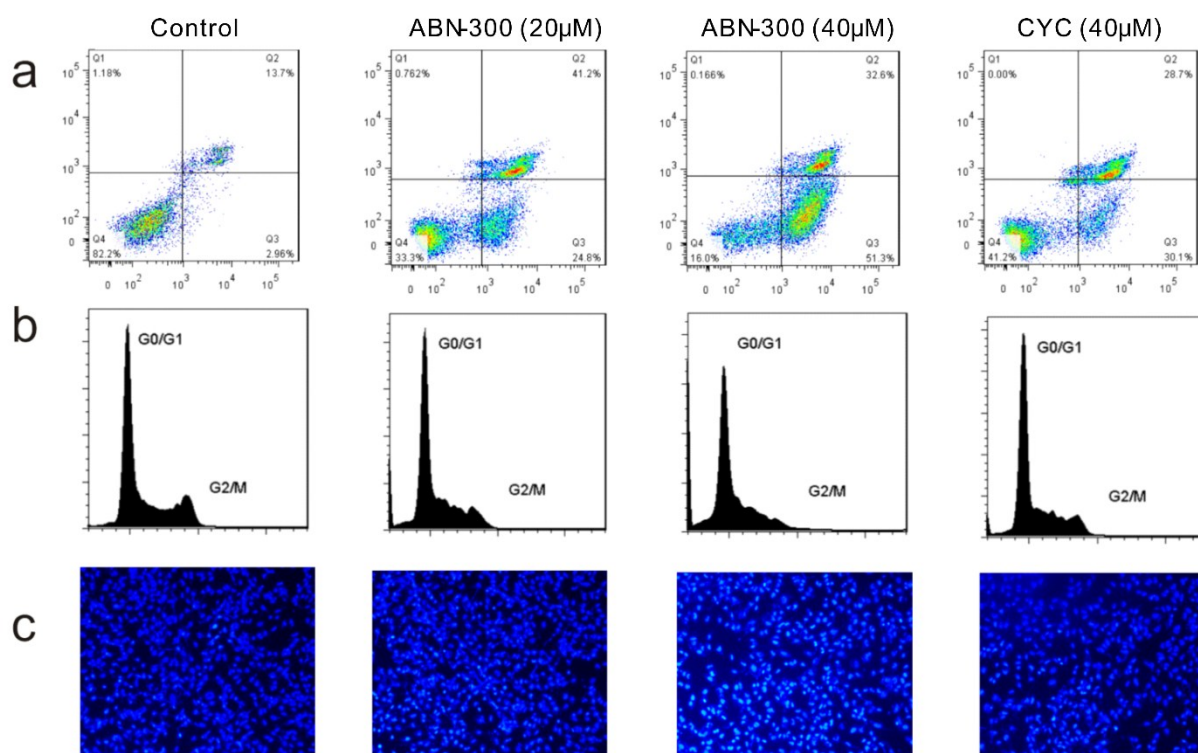

**Figure S3.** Comparison between the antitumor effect of free CYC and CYC-ABNs. a) Annexin V/PI staining assays of control, ABN-300 (20 μM), ABN-300 (40 μM), and CYC (40 μM). b) Cell cycle assays of control, ABN-300 (20 μM), ABN-300 (40 μM), and CYC (40 μM). c) Hoechst staining of control, ABN-300 (20 μM), ABN-300 (40 μM), and CYC (40 μM).

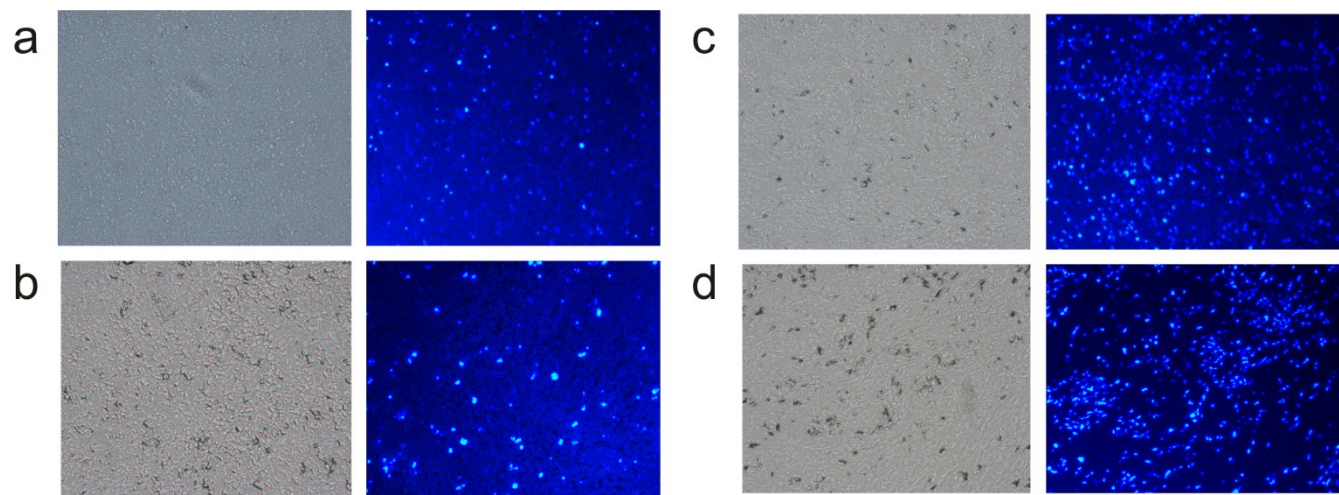

**Figure S4.** Hoechst staining of tumor tissues dissected from mice after treated with different treatment groups at day 14. a) PBS treated group b) CYC treated group c) ABN-100 treated d) ABN-300 treated.

**Table S2.** Blood biochemical indexes of mice treated with ABNs.

| Test                | Sex | Normal    | Sham        | ABNs        |
|---------------------|-----|-----------|-------------|-------------|
| GOT/AST [U/L]       | M   | 74–143    | 61.8 ± 1.1  | 60.8 ± 1.1  |
|                     | F   | 65–203    | 73.6 ± 0.8  | 83.6 ± 0.8  |
| GPT/ALT [U/L]       | M   | 18–45     | 40.4 ± 0.5  | 45.4 ± 0.5  |
|                     | F   | 16–48     | 22.6 ± 0.8  | 28.6 ± 0.8  |
| Urea [mg/ dL]       | M   | 12.3–24.6 | 16.5 ± 0.9  | 18.1 ± 0.8  |
|                     | F   | 13.2–27.1 | 17.1 ± 1.8  | 13.3 ± 0.8  |
| Creatinine [mg/ dL] | M   | 0.2–0.5   | 0.39 ± 0.1  | 0.44 ± 0.02 |
|                     | F   | 0.2–0.6   | 0.36 ± 0.04 | 0.42 ± 0.06 |
